# Supplementary material for: Quality assessment of YUNYAO radio occultation data in the neutral atmosphere
Source: Copernicus journal article supplement (doi:10.5194/amt-18-1339-2025), 2025-03-19
Supplement: Supplementary file 1 [file amt-18-1339-2025-supplement.pdf]

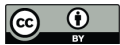

*Supplement of*

## **Quality assessment of YUNYAO radio occultation data in the neutral atmosphere**

**Xiaoze Xu et al.**

*Correspondence to:* Wei Han ([hanwei@cma.gov.cn](mailto:hanwei@cma.gov.cn))

The copyright of individual parts of the supplement might differ from the article licence.

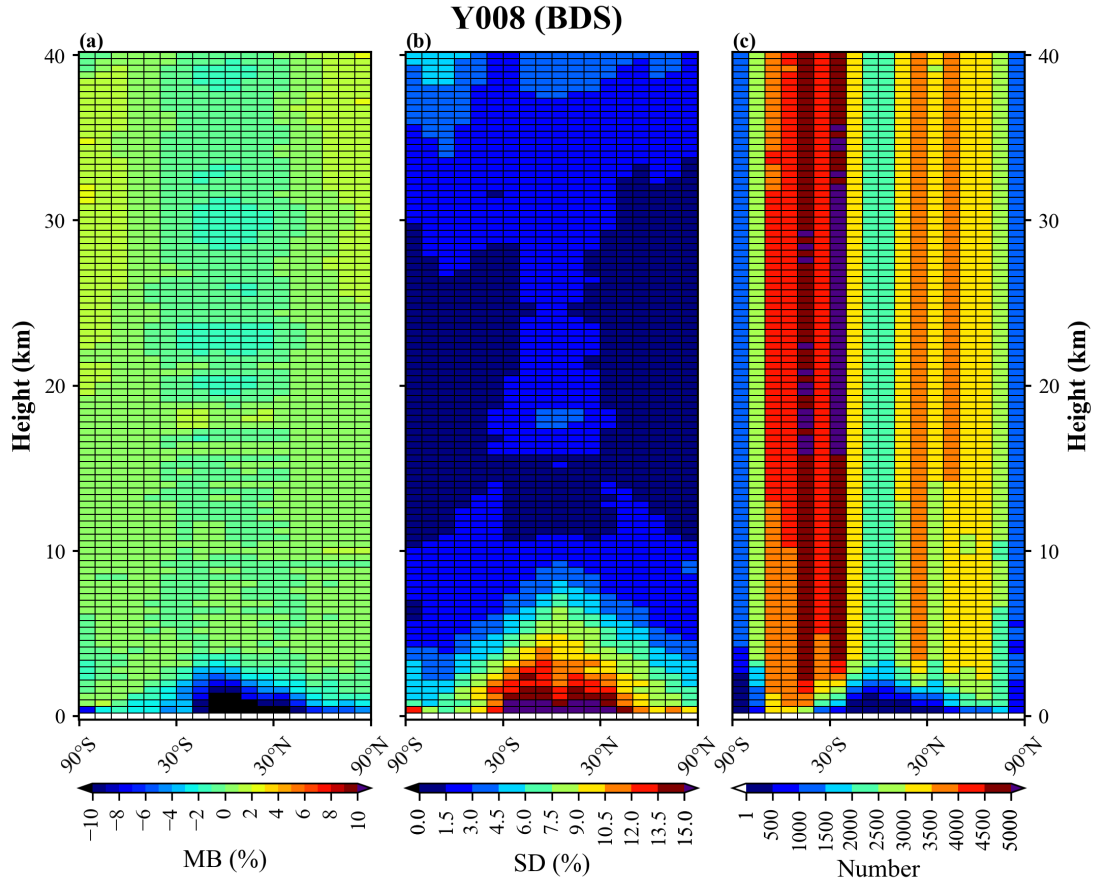

**Figure S1: The latitude variation of the MB (a) and SD (b) of Y008 BDS bending angle profiles compared to ERA5, as well as the latitude variation of observation number (c).**

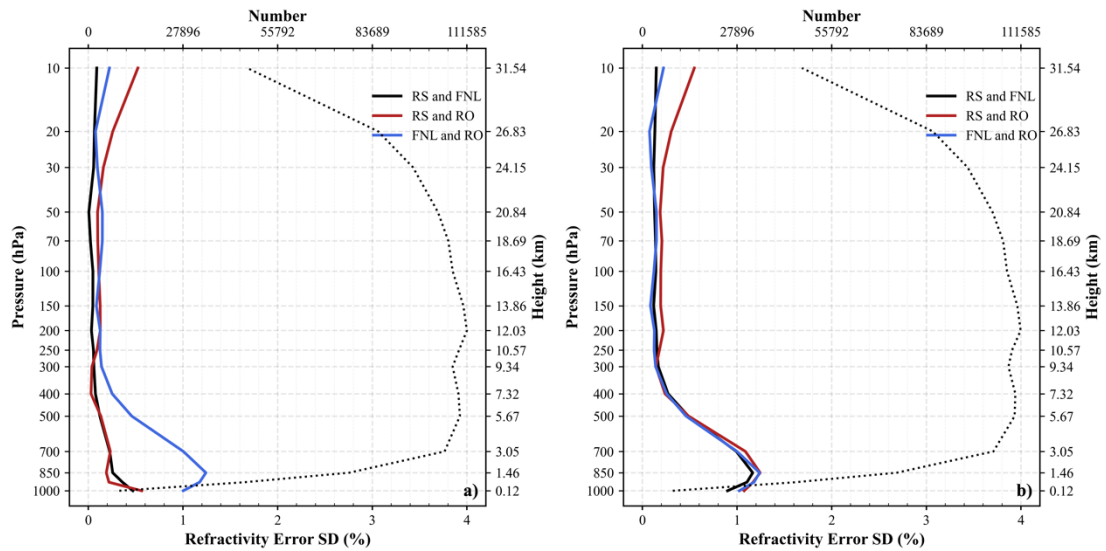

**Figure S2: 3CH estimates of refractivity error SD of ERA5. (a) a spatial-temporal sampling correction was applied to the RS data, (b) a spatial-temporal sampling correction was not applied to the RS data. The solid and dash-dotted lines represent refractivity error SD and matched data number. Black, red, and blue represent different combinations of the other two datasets (RS and FNL, RS and RO, as well as FNL and RO), respectively. The horizontal axis below each subplot is used for refractivity error SD, while the horizontal axis above is used for data number. The right**

vertical axis represents the average height of all samples at each pressure level.

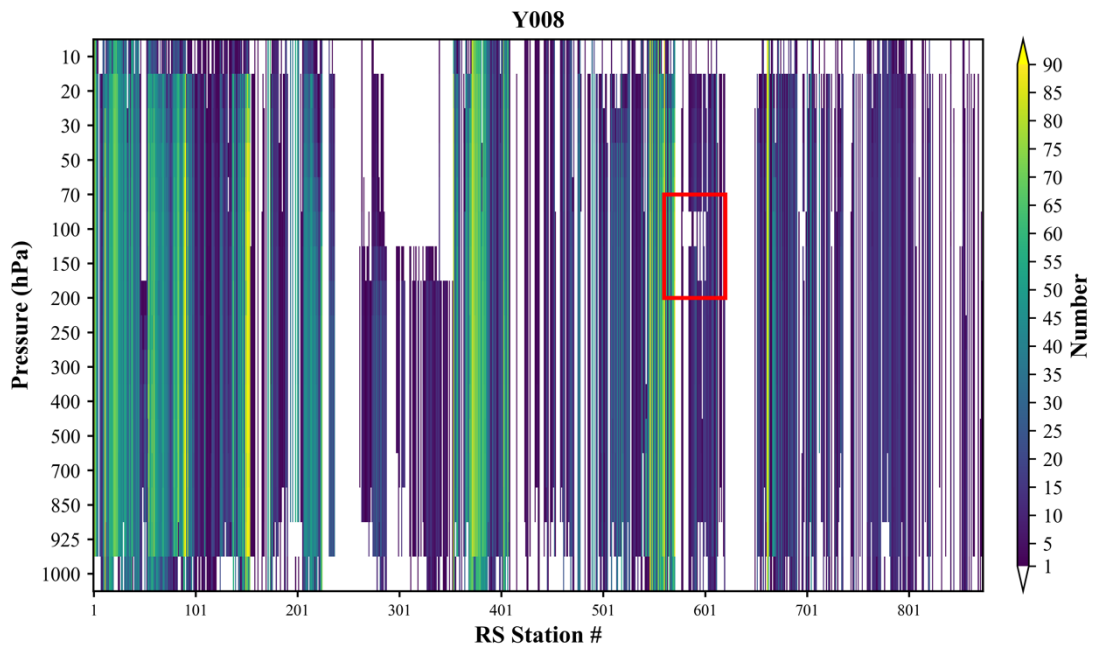

Figure S3: The number of Y008 RO observations matched to each of the 873 RS stations.

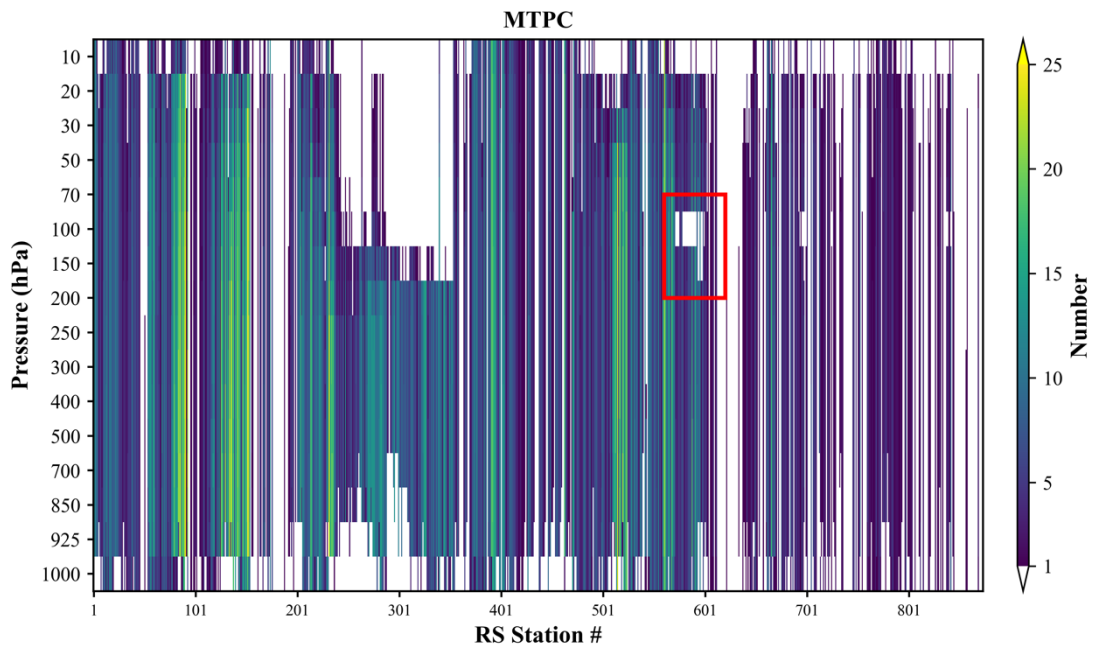

Figure S4: The number of MTPC RO observations matched to each of the 873 RS stations.

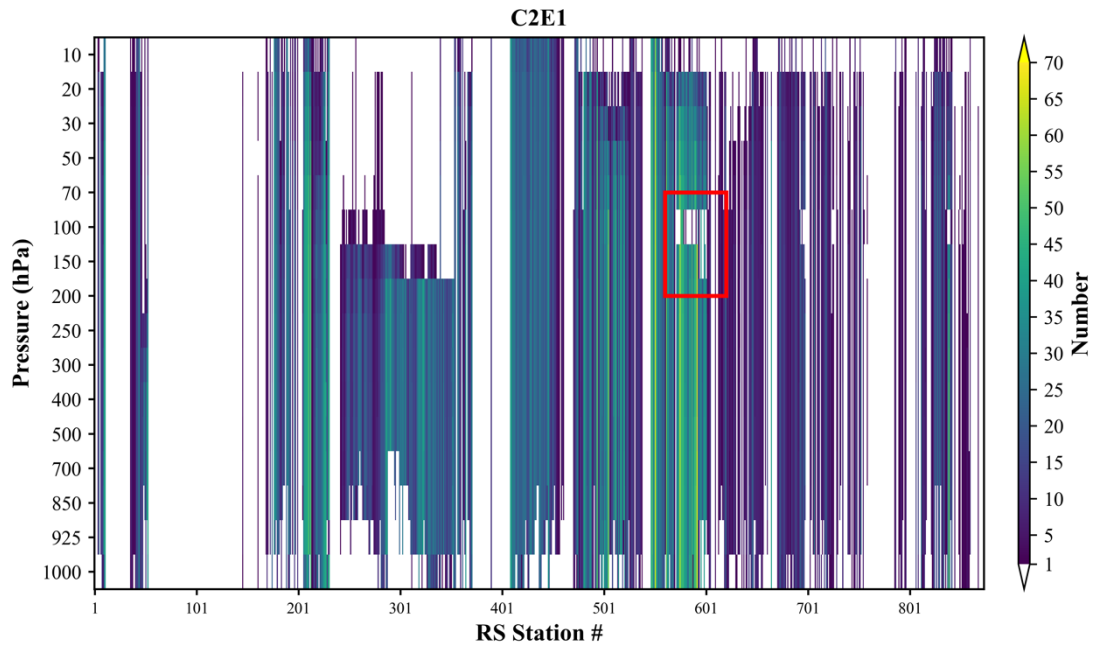

**Figure S5: The number of C2E1 RO observations matched to each of the 873 RS stations.**
